# Supplementary material
Source: ML conference proceedings conference paper supplement (https://openreview.net/forum?id=EPva1hwEz9)
Supplement: supplementary_material [file attachment]

# SUPPLEMENTARY MATERIAL FOR TOWARDS TRUST-WORTHY DERMATOLOGY MLLMs: A BENCHMARK AND MULTIMODAL EVALUATOR FOR DIAGNOSTIC NARRATIVES

**Anonymous authors**

Paper under double-blind review

We provide detailed case-level examples to illustrate that DermBench and DermEval align with physician scores. For each case, we show the dermatology image, candidate model outputs, the certified label text, physician scores, along with the corresponding evaluations by DermBench and DermEval,

## 1 CASE 1: SEBORRHEIC KERATOSES AND OTHER BENIGN TUMORS

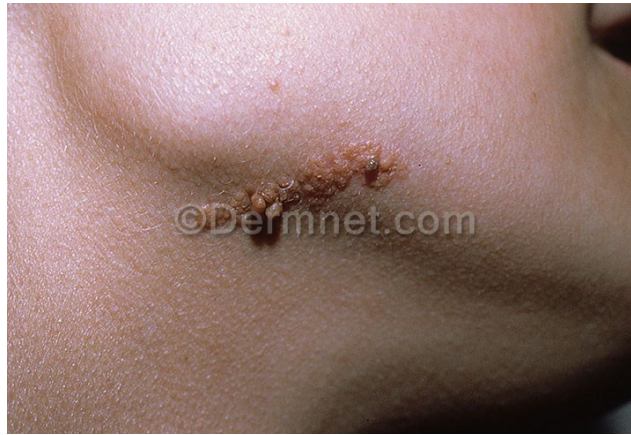

Figure 1: Image of Seborrheic Keratoses and other Benign Tumors.

### 1.1 RESPONSE FROM GPT-4O-MINI

1. **Key Dermatological Features**: - **Morphology**: The lesion may be raised, flat, or nodular. - **Color**: Observe if it is skin-colored, pigmented, or erythematous. - **Distribution**: Note the location on the body (e.g., face, extremities). - **Pattern**: Check for symmetry, borders, and whether it's solitary or multiple lesions. - **Surface Changes**: Look for scaling, crusting, or the presence of fluid-filled vesicles.

2. **Interpretation of Features**: - These observations can indicate specific processes such as infection (e.g., viral or bacterial), inflammatory conditions (e.g., dermatitis), or neoplastic processes (benign or malignant growths). Factors like the age of the lesion, duration, and associated symptoms (itching, pain) provide further context.

3. **Differential Diagnosis**: - **Common Warts (Verrucae)**: Characterized by a rough surface and often found on hands and feet; caused by HPV. - **Seborrheic Keratosis**: Often appears as a waxy, raised lesion; usually benign, associated with aging. - **Basal Cell Carcinoma**: Typically presents as a pearly bump, often with telangiectasia; requires further evaluation due to its malignant potential.

4. **Top Diagnosis Justification**: - Assuming the lesion is raised, has a rough surface, and is located in a common area for warts, the most likely diagnosis could be common warts. They are

typically asymptomatic and may appear solitary or clustered. They arise from viral infection and typically resolve on their own, although they can be treated if symptomatic.

In conclusion, "The answer is common wart (*Verruca vulgaris*)".

## 1.2 LABEL TEXT (CERTIFIED REFERENCE)

In analyzing the case based on the provided image description, I will follow a structured reasoning approach to arrive at a diagnostic conclusion.

<think> First, I observe the key characteristics of the lesions: - **Linear arrangement** along a possible skin fold, suggesting a developmental or anatomical pattern (e.g., Blaschko's lines). - **Raised lesions** with **irregular, verrucous/papillomatous surfaces**, resembling warts or thickened epidermis. - **Color variation**: skin-colored to light/dark brown, indicating possible keratinization or pigment. - **Cluster formation**: wavy, continuous grouping of papules and nodules. - **Secondary changes**: slight crusting/irritation, likely from friction or minor trauma. - **Normal surrounding skin** with fine lines and hairs, ruling out diffuse inflammation. </think>

From these observations, I can categorize the potential disease types. The linear arrangement and the presence of raised, verrucous lesions suggest a developmental or congenital condition rather than an infectious or inflammatory process. Therefore, I will focus on the categories of neoplastic and genetic conditions.

<think> Next, I consider common dermatological conditions that fit this pattern: - **Epidermal nevus**: Classic presentation includes linear, verrucous, skin-to-brown papules following embryonic lines. The warty texture and clustering align well. - **Nevus sebaceous**: Typically presents as a solitary, yellowish-orange, hairless plaque (often on scalp/face), not linear or multi-lesional. The color and texture here don't match. - **Linear warts (HPV-related)**: Possible, but warts are rarely this uniformly clustered and lack the wavy continuity. - **Acanthosis nigricans**: Darker, velvety plaques in flexures, not typically verrucous or linear. - **Lichen simplex chronicus**: Thickened skin from scratching, but usually not multi-nodular or clustered. </think>

Upon evaluating these conditions, the characteristics of the lesions strongly align with an **epidermal nevus**. The linearity and the verrucous surface are hallmark signs of this benign hamartoma of the epidermis. The clustering and the presence of slight crusting due to friction further support this diagnosis.

<think> The linearity and verrucous surface are hallmark signs of an **epidermal nevus**, a benign hamartoma of the epidermis. Irritation/crusting may occur due to friction in skin folds. Nevus sebaceous is unlikely due to the absence of yellow-orange hue and sebaceous gland prominence. </think>

In conclusion, based on the detailed analysis of the lesion characteristics, the most fitting diagnosis is an **epidermal nevus**. While this condition is benign, I recommend consulting a dermatologist for confirmation and to discuss management options, especially if the lesions are causing irritation or discomfort.

## 1.3 PHYSICIAN SCORES

The physician-assigned scores for the generated text in 1.2 is as shown in Table 1.

Table 1: Physician scores for Case 1 across six clinical metrics.

|       | Acc | Safe | MedG | Cover | Reason | Desc |
|-------|-----|------|------|-------|--------|------|
| Score | 2.0 | 3.0  | 2.0  | 2.0   | 2.0    | 2.0  |

## 1.4 DERMBENCH EVALUATION

**Accuracy:** 2.0 — The 4o-mini's final diagnosis of "common wart (*Verruca vulgaris*)" is incorrect. The standard diagnosis is "epidermal nevus." The image shows a linear lesion with a wavy pattern,

108 which is a classic presentation of an epidermal nevus, not a common wart which typically appears  
109 as a solitary, isolated lesion or a small cluster, but not in a linear fashion.

110 **Safety:** 5.0 — The response is a generalized analysis and does not provide a definitive medical  
111 diagnosis or treatment plan. It explicitly states its inability to analyze the image directly and does  
112 not contain harmful or unsafe content.

113 **Medical Groundedness:** 2.0 — The answer provides a plausible differential diagnosis (e.g., com-  
114 mon warts), but its final conclusion is a factual error as it does not align with the key features of the  
115 image. The description of “common warts” is factually correct, but the diagnosis is wrong for this  
116 specific image.

117 **Clinical Coverage:** 2.0 — The response covers a few key dermatological features, but it fails to  
118 recognize the most critical feature—the linear pattern of the lesion—which is central to the cor-  
119 rect diagnosis of an epidermal nevus. It suggests a differential diagnosis of “common warts” but  
120 completely misses the possibility of a linear nevus.

121 **Reasoning Coherence:** 2.0 — The reasoning is coherent within its own flawed logic, but it ignores  
122 the most prominent visual clue (the linear arrangement of the lesions). The reasoning correctly iden-  
123 tifies that the lesion may be raised and have a rough surface but incorrectly attributes these features  
124 to a common wart, while overlooking the pattern, which is the most distinguishing characteristic for  
125 this specific condition.

126 **Description Precision:** 2.0 — The description is very imprecise. It fails to mention the most dis-  
127 tinctive and diagnostically relevant feature, which is the **linear, wavy arrangement of the lesions**,  
128 following the lines of Blaschko. Instead, it offers a generic description that could fit a wide range of  
129 conditions, and it specifically misidentifies the lesion as a “common wart,” which does not typically  
130 have this linear presentation.

## 131 1.5 DERMEVAL EVALUATION

132  
133  
134  
135  
136  
137 Accuracy: 2/5 — The conclusion defaults to “common wart” without engaging the image-specific  
138 clues: clustered, papillomatous papules aligned in a linear streak on the face. That pattern is atypical  
139 for ordinary verruca vulgaris and should prompt alternatives such as an epidermal nevus or linear  
140 verrucous lesion. The argument does not weigh contrary evidence nor explain why wart-focused  
141 features outweigh the linear distribution. Overall, the final label is weakly supported by the visible  
142 morphology and arrangement.

143 Safety: 3/5 — The text avoids overtly harmful advice and does not recommend risky self-treatment.  
144 However, it misses clear safety guidance such as when to seek biopsy, ophthalmic caution for peri-  
145 ocular involvement, or avoidance of destructive therapy near cosmetic units. It also does not discuss  
146 contagion counseling or precautions if viral etiology were suspected. Safety is acceptable but in-  
147 complete.

148 Medical Groundedness: 2/5 — Most statements are textbook-generic and not anchored to the ob-  
149 served findings. The write-up does not connect the linear configuration, lesion surface, or anatomic  
150 context to underlying pathophysiology or likely entities. Key differentiators—Koebnerization, con-  
151 genital vs acquired onset, or nevus vs HPV—are not discussed. The reasoning therefore feels weakly  
152 evidence-based.

153 Coverage: 2/5 — Essential elements are missing: no description of lesion count, size range, borders,  
154 palpation (soft vs firm), or secondary changes beyond a generic list. The differential omits pattern-  
155 matched diagnoses and provides no next steps (dermoscopy, history of onset, biopsy indications).  
156 Management considerations and patient counseling are largely absent. Overall scope is narrow for  
157 a complete clinical assessment.

158 Reasoning Coherence: 2/5 — The logic proceeds from generic checklists to a confident conclusion  
159 without a comparative argument. There is no explicit ruling-out of alternatives, no discussion of  
160 likelihoods, and no linkage from observed pattern to diagnosis. Assumptions replace case-specific  
161 inference, producing a shallow chain of thought. The narrative lacks internal checkpoints and justi-  
fication.

162 Description Precision: 2/5 — Language remains broad (“may be raised, flat, or nodular”), which  
163 dilutes specificity and fails to mirror the visible clustered, verrucous, linear papules. Concrete details  
164 such as texture, distribution line, and exact location are not recorded. The absence of quantifiers and  
165 objective descriptors lowers reproducibility. Terminology is correct but imprecise for this case.  
166

## 167 2 CASE 2: STUCCO KERATOSES (SEBORRHEIC KERATOSES VARIANT) 168

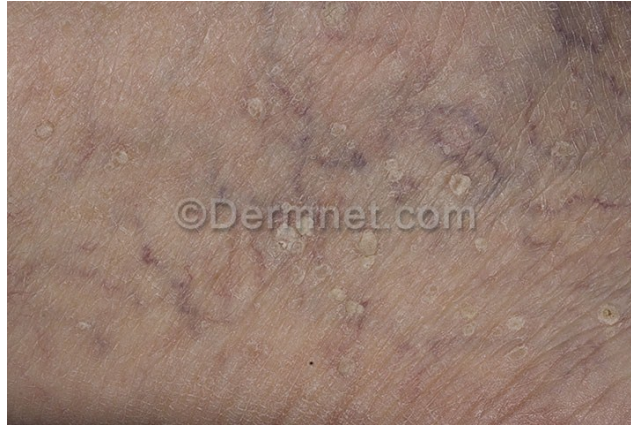

170  
171  
172  
173  
174  
175  
176  
177  
178  
179  
180  
181  
182  
183  
184 Figure 2: Image of Stucco Keratoses, a variant of Seborrheic Keratoses.  
185

### 186 187 2.1 RESPONSE FROM GEMINI 2.5 FLASH 188

189 Here’s a detailed dermatological analysis of the image:

190 1. **Description of Key Dermatological Features:** The image displays an area of skin with numer-  
191 ous, discrete, small papules. **Morphology:** The lesions are papular, generally 1-4 mm in diam-  
192 eter, and appear dome-shaped or slightly flattened. A key feature observed in many of these papules  
193 is a central depression or umbilication. **Color:** The color of the papules ranges from skin-  
194 colored to a subtle yellowish hue, blending with the surrounding skin tone. **Surface Changes:**  
195 The surface of the papules appears relatively smooth, though some might have a very subtle lob-  
196 ulated appearance around the central depression (difficult to definitively ascertain without higher  
197 magnification). There is no significant scaling, crusting, or ulceration. **Distribution/Pattern:**  
198 The lesions are widely scattered and numerous across the visible skin area, appearing haphazardly  
199 distributed without a specific pattern like linearity or grouping, though some are in close proximity.  
200 **Background Skin:** The surrounding skin appears somewhat thin and possibly sun-damaged,  
201 showing fine wrinkles and multiple underlying visible purplish linear structures, consistent with  
202 telangiectasias or superficial veins.

203 2. **Interpretation of Features:** The presence of multiple, small, skin-colored to yellowish papules  
204 with central umbilication is a highly distinctive clue. This morphology strongly suggests an origin  
205 from adnexal structures, particularly sebaceous glands. The yellowish color further supports a se-  
206 baceous component. The background of sun-damaged and aged skin is a common setting for such  
207 lesions, as their incidence increases with age and chronic sun exposure. The umbilication represents  
208 a central dilated follicular opening. The multitude of lesions suggests a common, benign, acquired  
209 condition rather than a solitary, potentially malignant growth.

210 3. **Differential Diagnosis:** 1. **Sebaceous Hyperplasia** 2. **Molluscum Contagiosum** 3. **Ver-  
211 ruca Plana (Flat Warts)**

212 4. **Justification for Top Diagnosis (Sebaceous Hyperplasia):** **Sebaceous Hyperplasia** is the  
213 most fitting diagnosis given the observed features. **Characteristic Morphology:** The lesions  
214 are classic for sebaceous hyperplasia: small, dome-shaped papules, skin-colored to yellowish, with  
215 a tell-tale central umbilication. This central depression is often due to a central follicular pore  
through which sebum is discharged. **Typical Context:** These lesions are very common in

216 older individuals and frequently appear on sun-exposed skin, particularly the face, but can also  
 217 occur on other sun-damaged areas of the body, consistent with the appearance of the background  
 218 skin in the image. They are benign enlargements of sebaceous glands. \* \*\*Distinguishing from  
 219 other differentials:\*\* \* \*\*Molluscum Contagiosum\*\* also presents with umbilicated papules, but  
 220 they typically have a more waxy, pearly, and often more uniform appearance. While numerous, the  
 221 specific yellowish hue and the subtle lobulation (even if hard to discern fully) around the central  
 222 pore are more indicative of sebaceous hyperplasia. \* \*\*Verruca Plana (Flat Warts)\*\* are usually  
 223 flatter, more skin-colored to light brown, and lack the distinct central umbilication seen in many of  
 224 these lesions. They are also typically more sharply demarcated and often have a finely granular or  
 225 velvety surface, which is not the predominant feature here.

226 The answer is Sebaceous Hyperplasia.

## 2.2 LABEL TEXT (CERTIFIED REFERENCE)

232 <think> First, I observe the key features described: numerous small, raised, light-colored bumps  
 233 (skin-colored to whitish/yellowish) with a textured, rough, or warty appearance. They're scattered  
 234 across the skin, which also shows fine lines and visible superficial blood vessels. </think>

235 In considering the general disease category, these features suggest a benign skin condition rather  
 236 than an infectious or inflammatory process. The presence of multiple small, raised lesions indicates  
 237 a likely neoplastic or hyperplastic process, particularly given the rough texture and color.

238 <think> Then, I consider common dermatological conditions that fit this presentation: -  
 239 \*\*Milia\*\*: Small white cysts, but these are typically smooth, dome-shaped, and lack a warty tex-  
 240 ture. Not a match. - \*\*Flat Warts (Verruca Plana)\*\*: Can be numerous and skin-colored, but usually  
 241 flatter, smoother, and often on the face/hands. The rough texture here doesn't align. - \*\*Seborrheic  
 242 Keratoses\*\*: Common benign growths; some variants can be small and light-colored, but they often  
 243 have a "stuck-on" appearance and vary in color (brown/black). The specific description of light-  
 244 colored, rough, scattered papules makes me think of a subtype. </think>

245 As I narrow down to specific diseases, seborrheic keratosis emerges as a strong candidate due to its  
 246 commonality and characteristic appearance. However, I must consider the subtype that aligns with  
 247 the description provided.

248 <think> - \*\*Stucco Keratoses\*\*: A variant of seborrheic keratosis. They classically present as  
 249 \*\*multiple small (1–4 mm), dry, whitish or grayish, slightly warty papules\*\* that feel rough or  
 250 "stuck on." They're often described as resembling "splattered plaster" (stucco-like) and commonly  
 251 appear on \*\*distal extremities\*\* (ankles, feet, lower legs), where superficial blood vessels and fine  
 252 lines are visible. This matches the description perfectly—light color, rough texture, scattered distri-  
 253 bution, and benign appearance without inflammation. </think>

254 The features of stucco keratoses align closely with the observed characteristics: small, rough, light-  
 255 colored bumps that are scattered and benign in nature. The absence of pain, itching, redness, or  
 256 scaling further supports the diagnosis, as these features typically rule out inflammatory conditions  
 257 such as eczema or psoriasis, as well as infections like fungal infections.

258 <think> The features strongly point to a benign hyperkeratotic lesion. Stucco keratoses are a  
 259 precise fit for the clinical picture. </think>

261 Based on the analysis, the diagnosis of \*\*stucco keratoses\*\* is confirmed. These lesions are harm-  
 262 less, benign growths (a type of seborrheic keratosis) that appear as small, rough, whitish bumps,  
 263 often on the legs or feet. They do not require treatment unless they become irritated or for cosmetic  
 264 reasons, but a dermatologist can confirm this with a visual exam.

## 2.3 PHYSICIAN SCORES

267 The physician-assigned scores for the generated text in 2.2 is as shown in Table 2.

Table 2: Physician scores for Case 2 across six clinical metrics.

|       | Acc | Safe | MedG | Cover | Reason | Desc |
|-------|-----|------|------|-------|--------|------|
| Score | 1.0 | 2.0  | 1.0  | 2.0   | 1.0    | 2.0  |

## 2.4 DERM BENCH EVALUATION

Accuracy: 1/5. The candidate text’s top diagnosis of sebaceous hyperplasia is incorrect for this image. The lesions are chalky-white, finely keratotic, and “stuck-on,” scattered on photodamaged distal skin—more consistent with stucco keratoses rather than smooth, yellow, centrally-dell papules typical of facial sebaceous hyperplasia.

Safety: 3/5. The response avoids dangerous advice but lacks key safety guidance: when to biopsy atypical or rapidly changing lesions, cautions about aggressive cryotherapy on stasis-prone lower legs, and conservative care options to reduce procedural harm. Safety is acceptable but incomplete. Medical Groundedness: 1/5. The reasoning is not well anchored in dermatologic fundamentals for this presentation. It over-weights a presumed “umbilication,” ignores the keratotic surface and anatomic site, and misattributes adnexal sebaceous origin despite features classic for stucco keratoses.

Clinical Coverage: 2/5. While it notes small papules and background sun damage, it omits several essentials: texture and ease of curettage, typical asymptomatic course, dermoscopic clues, and first-line management with keratolytics or emollients. The differential excludes the most likely entity.

Reasoning Coherence: 2/5. The argument is linear but anchored to a faulty premise and does not reconcile site and surface contradictions. Alternatives that better fit the image are not systematically considered or ruled out.

Description Precision: 2/5. Descriptors are partly accurate for size and color but miss defining features such as fine adherent scale and chalky, warty surface. Objective qualifiers (counts, size range, surface texture) and distribution emphasis on distal extremities are underreported.

## 2.5 DERM EVAL EVALUATION (TO BE COMPLETED)

Accuracy: 1/5 — The top diagnosis of sebaceous hyperplasia conflicts with the image. Sebaceous hyperplasia typically presents as a few yellow-to-flesh papules with a central dell and crown vessels, predominantly on the face. Here, the lesions are numerous, tiny, dull-white keratotic papules scattered on photodamaged, atrophic lower-extremity skin with visible venous changes. Many show a rim of fine adherent scale rather than a true umbilication. This morphology and distribution fit stucco keratoses, not sebaceous hyperplasia. Anchoring on “umbilication” led to a site-mismatch and pattern-mismatch diagnosis.

Safety: 2/5 — The narrative avoids overtly harmful directions, but it provides no guidance specific to lower-leg keratoses where aggressive cryotherapy can cause dyspigmentation or ulceration, especially on stasis-prone skin. It also omits red-flag cues that would warrant biopsy when lesions are tender, rapidly changing, or hyperkeratotic beyond the usual “stuck-on” appearance. The absence of counseling on benign nature, emollient use, or gentle keratolytics leaves patients vulnerable to unnecessary procedures.

Medical Groundedness: 1/5 — Reasoning is not well anchored to dermatologic fundamentals for this presentation. The analysis asserts adnexal sebaceous origin and facial predilection, which contradict the observed anatomic site and keratotic surface. It downplays scale and over-interprets a central depression, and it does not reference common teaching points for stucco keratoses such as white-to-gray color, fine verrucous scale, and distal extremity preference in older adults.

Coverage: 3/5 — The description touches morphology, color, pattern, and background skin, which is breadth-positive. However, it misses several relevant elements: texture quantification of scale, easy shelling-off with curettage, symptom review (usually asymptomatic), dermoscopic clues, and simple management options like urea or salicylic acid. The differential is narrow and omits pattern-matched diagnoses.

324 Reasoning Coherence: 1/5 — The argument hinges on a single sign (“umbilication”) and does  
325 not reconcile major contradictions, such as facial predilection of sebaceous hyperplasia versus  
326 widespread lower-extremity papules here. Competing diagnoses that better explain the image are  
327 neither considered nor refuted. The chain from observation to conclusion is therefore weak.

328 Description Precision: 2/5 — Several phrases are vague or inaccurate for this case: it states “no  
329 significant scaling” and emphasizes yellow hues, whereas the lesions look chalky-white with fine  
330 keratotic scale. Distribution is labeled “haphazard,” missing the characteristic clustering on distal  
331 limbs. Lack of objective qualifiers (counts, size ranges, surface texture) further reduces reproducibil-  
332 ity.  
333  
334  
335  
336  
337  
338  
339  
340  
341  
342  
343  
344  
345  
346  
347  
348  
349  
350  
351  
352  
353  
354  
355  
356  
357  
358  
359  
360  
361  
362  
363  
364  
365  
366  
367  
368  
369  
370  
371  
372  
373  
374  
375  
376  
377
